# Supplementary material for: Photostable far-red emitting pluronic silicate nanoparticles: perfect blood pool fluorophores for biphotonic in vivo imaging of the leaky tumour vasculature
Source: Royal Society of Chemistry journal article supplement (doi:10.1039/c6ra17438h), 2016-01-01
Supplement: c6ra17438h3.pdf [file c6ra17438h3.pdf]

## Supplementary Information for

### Photostable far-red emitting pluronic silicate nanoparticles: perfect blood pool fluorophores for biphotonic *in-vivo* imaging of the leaky tumour vasculature

Zheng Zheng,<sup>§</sup> Flavien Caraguel,<sup>||</sup> Yuan-Yuan Liao,<sup>§</sup> Chantal Andraud,<sup>§, \*</sup> Boudewijn van der Sanden,<sup>||, \*</sup> and Yann Bretonnière,<sup>§, \*</sup>

<sup>§</sup> Univ Lyon, ENS de Lyon, CNRS, Université Lyon 1, Laboratoire de Chimie, F-69342 Lyon (France)

<sup>||</sup> Platform intravital microscopy, CEA-INSERM-Grenoble Alps University, UMR 1036, Biology of Cancer and Infection, 17 rue des Martyrs, Grenoble (France)

To whom correspondence should be addressed.

E-mail: [boudewijn.vandersanden@univ-grenoble-alpes.fr](mailto:boudewijn.vandersanden@univ-grenoble-alpes.fr)  
[yann.bretonniere@ens-lyon.fr](mailto:yann.bretonniere@ens-lyon.fr)

# Contents

|                                                                      |    |
|----------------------------------------------------------------------|----|
| Synthesis .....                                                      | 3  |
| Optimization of Nanoparticles Preparation and Characterization ..... | 3  |
| Optical measurements .....                                           | 5  |
| Stability measurements .....                                         | 6  |
| Cytotoxicity Cells Assays .....                                      | 7  |
| <i>In vivo</i> two-photon microscopy .....                           | 9  |
| References .....                                                     | 14 |
| Additional Data .....                                                | 15 |

# Synthesis

---

## 2,7-dibromo-9,9-dimethyl-9H-fluorene

2,7-dibromofluorene (0.44 g, 1.35 mmol) and benzyltriethylammonium chloride (0.15 g, 0.68 mmol) were dissolved in DMSO (8 mL) under argon atmosphere. NaOH (1.25 mL, 50 wt%) was added to this mixture portion-wise over 5 min. Bromoethane (0.44 g, 4.04 mmol) was slowly dropped to the reaction mixture. The mixture was stirred at room temperature for 2 days. Ethyl acetate (50 mL) was added to the reaction mixture and then this mixture was washed by HCl (35 wt%) and water. The organic layer was dried over Na<sub>2</sub>SO<sub>4</sub> and filtered. The solution was evaporated to afford a white solid (0.49 g, yield: 95%). <sup>1</sup>H NMR (300 MHz, CDCl<sub>3</sub>, ppm): δ 7.49 (m, 6H), 2.00 (q, *J* = 7.4 Hz, 4H), 0.31 (t, *J* = 7.3 Hz, 6H); <sup>13</sup>C NMR (75 MHz, CDCl<sub>3</sub>, ppm): δ 151.7, 139.4, 130.2, 126.2, 121.5, 121.1, 56.7, 32.6, 8.4.

## 7-bromo-9,9-diethylfluorene-2-carbaldehyde

A solution of 2,7-dibromo-9,9-dimethyl-9H-fluorene (1 g, 2.63 mmol) in anhydrous THF (8 mL) was cooled to -78°C under argon using an acetone dry-ice bath. n-BuLi (1.64 mL, 2.62 mmol., 1.6 M in hexanes) was added dropwise over 20 min. Dry DMF (0.3 mL) was added slowly to the reaction solution after 1h at -78°C. After stirring for 2h at -78°C, the mixture was brought back to room temperature and the reaction was quenched by carefully adding HCl (2 N). The solution was extracted with dichloromethane. The organic layer was dried over Na<sub>2</sub>SO<sub>4</sub>, filtered, and concentrated. The crude product was purified by chromatography on silica gel eluting with ethyl acetate/petroleum ether (1:20 by volume) to afford a white solid (0.8 g, yield: 92 %). <sup>1</sup>H NMR (300 MHz, CDCl<sub>3</sub>, ppm): δ 10.02 (s, 1H), 7.82 (m, 2H), 7.78 (d, *J* = 8.2, 1H), 7.62 (d, *J* = 8.6, 1H), 7.48 (m, 2H), 2.03 (m, 4H), 0.26 (t, *J* = 7.3 Hz, 6H); <sup>13</sup>C NMR (75 MHz, CDCl<sub>3</sub>, ppm): δ 192.1, 153.4, 150.3, 146.7, 138.9, 135.6, 130.6, 130.5, 126.5, 123.2, 123.1, 122.2, 120.0, 56.6, 32.5, 8.4.

# Optimization of Nanoparticles Preparation and Characterization

---

## F127-SiO<sub>2</sub> NPs

In a 5mL round-bottom flask, Pluronic® F127 (200mg) was dissolved in 2-3mL of dichloromethane. A predetermined amount *m* of dye was added that gave a dye to pluronic weight fraction between 0.05 and 0.30w% (see entry 1-5, *table S-1* below). The solution was subsequently stirred at room temperature for 40min to obtain a homogeneous red solution. Dichloromethane was then evaporated

with a gentle flow of argon to give a film. 0.85N hydrochloric acid (3.12mL) was added and the mixture was stirred until a stable and optically transparent solution was obtained. TEOS (360 $\mu$ L) was then added to the solution and the stirring continued for 105min. DEDMS (30 $\mu$ L) was finally added to terminate the particle growth. The final suspension was kept stirring at room temperature for 24h. The final suspension was kept stirring at room temperature for 24h. The solution was dialyzed for two days against distilled water to remove hydrochloride as well as unreacted low-molecular weight components, using a membrane bag with a 14,000 cut-off molecular weight. The suspension was then filtered through a 0.2 $\mu$ m syringe filter to remove large aggregates. The final volume is 3.6mL.

### Estimation of the encapsulation efficiency

0.1mL of the above solution was added to DMF (2.5mL) in which complete dissolution of the dye occurred (solution A). The same amount *m* of dye was dissolved in DMF (3.6mL). 0.1mL of this solution was added to 2.5mL DMF to give the same dilution as above (solution B). The quantity of dye encapsulated into the F127-SiO<sub>2</sub> NPs was estimated by measuring the absorption spectra after dissolution of the dye in DMF with reference to a standard in DMF. The encapsulation efficiency (Table S-1, Figure S-1) is defined as the ratio of the amount of the dye loaded in the NPs to the total amount of the dye in the feed mixture.[2]

$$\text{Encapsulation efficiency (in \%)} = \frac{Abs_{\text{solution A}}}{Abs_{\text{solution B}}} \times 100 \quad (1)$$

**Table SI. 1**@ F127-SiO<sub>2</sub> NPs synthesis.

| Entry | Dye 1 feeding ratio<br>[wt%] <sup>a</sup> | Dye 1 loading ratio<br>[wt%] <sup>b</sup> | Encapsulation efficiency<br>[%] |
|-------|-------------------------------------------|-------------------------------------------|---------------------------------|
| 1     | 0.05                                      | 0.048                                     | 96                              |
| 2     | 0.10                                      | 0.093                                     | 93                              |
| 3     | 0.15                                      | 0.14                                      | 93                              |
| 4     | 0.20                                      | 0.15                                      | 73                              |
| 5     | 0.30                                      | 0.15                                      | 51                              |
| 6     | 0.40                                      | 0.17                                      | 43                              |

<sup>a</sup> weight ratio of dye 1 to that of F127 in the feed mixture; <sup>b</sup> weight of loaded 1 to that of the F127 matrix in the NPs.

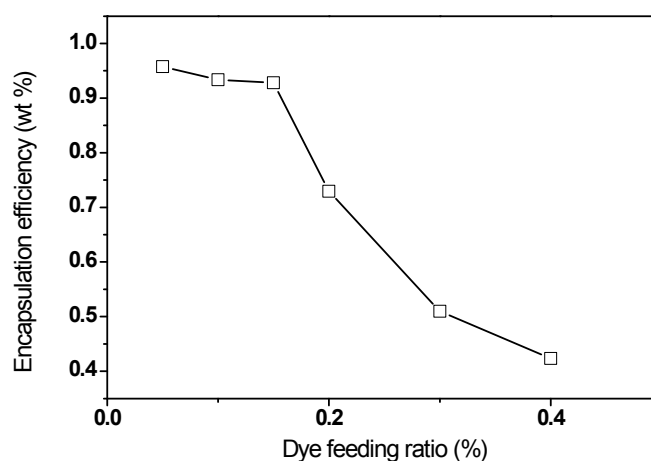

Fig. S1. Encapsulation efficiency as a function of dye feeding ratio.

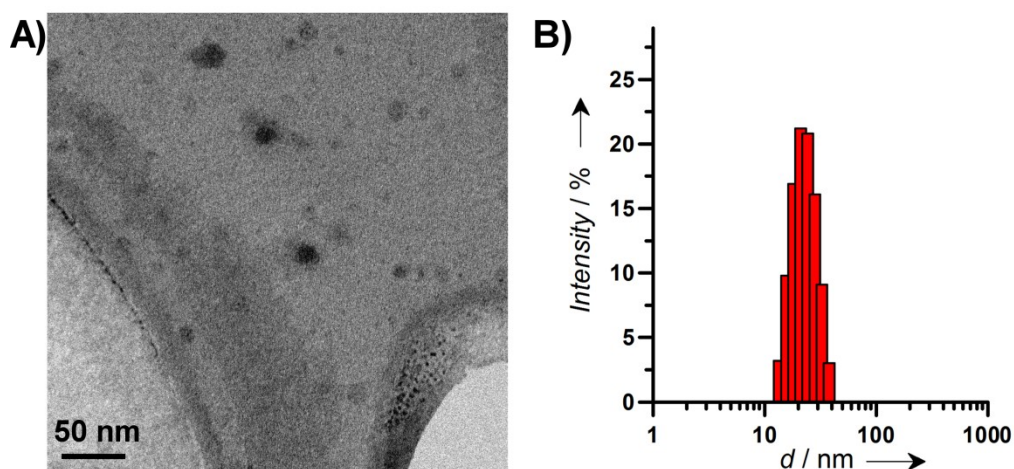

Fig. S2. TEM image and B) DLS distribution of 1@F127-SiO<sub>2</sub> NPs. C)

## Optical measurements

**Absorption spectra** (UV-Vis) were recorded on a dual beam Jasco 670 spectrometer.

**Fluorescence spectra** were performed on a Horiba Jobin-Yvon Fluorolog-3® spectrofluorimeter equipped with a red-sensitive Hamamatsu R928 photomultiplier tube. Spectra were reference corrected for both the excitation source light intensity variation (lamp and grating) and the emission spectral response (detector and grating).

**Fluorescence quantum yields**  $\Phi_F$  were measured in diluted solutions. *Rubrene* in methanol ( $\Phi_F=27\%$ ) [3] was used as reference. Sample and reference are excited at the same wavelength ( $\lambda_{exc}$ ). The quantum yield relative to the reference is given by equation (2):

$$\Phi^S = \Phi^{Ref} \frac{S^S}{S^{Ref}} \times \left( \frac{n_d^{Ref}}{n_d^S} \right)^2 \quad (2)$$

where  $S$  is the slope obtained by plotting the integrated area under the fluorescence emission spectrum vs the absorbance at  $\lambda_{exc}$  and  $n_d$  the refractive index of the solvents. Superscript *Ref* and *s* correspond to the reference and the sample respectively. For each experiment 5 points were recorded, all corresponding to an absorbance at  $\lambda_{exc}$  (and for wevelengths above) below 0.1.

**Absolute photoluminescence quantum yield for solid** were measured as described by de Mello *et al.* [4] and Porrès *et al.* [5] using an integrating sphere collecting all the emission ( $2\pi$  steradians covered with spectralon®), model F-3018 from Horiba Jobin Yvon. The sphere was calibrated with known standard (*Coumarin 153*, *Rhodamine 6G*, *DMANS*, *Erythrosine B* and *Tetraphenylporphyrin*).[6]

**Two-photon absorption spectra** were obtained by two-photon excited fluorescence measurements using a femtosecond Ti:sapphire laser in the range 730–960nm (80MHz, 140fs) as the light source. The excitation beam (5mm diameter) is focalized with a lens (focal length 10cm) at the middle of the fluorescence cell (10mm). The fluorescence signal, collected at 90° from the

excitation beam, was focused into an optical fiber (diameter 600 $\mu$ m) connected to an Ocean Optics S2000 spectrometer. The incident beam intensity was adjusted to 50mW in order to ensure an intensity-square dependence of the fluorescence over the entire spectral range of excitation. Detector integration time was fixed to 1s. Calibration of the spectra was performed by comparison with published 700-900nm *Coumarin 307*, *Coumarin 510*, *Coumarin 540* and *Fluorescein* two-photon absorption spectra.[7] Measurements were performed in chloroform (for **1**) or PBS (for **1@F127-SiO<sub>2</sub>** NPs) with concentrations in the range of  $1.0 \times 10^{-4}$  to  $1.5 \times 10^{-4}$  mol.L<sup>-1</sup>. Two-photon cross sections  $\sigma$  are given by equation (3):

$$\sigma = \sigma^{Ref} \frac{\Phi^{Ref} \epsilon^{Ref} n_d^{Ref} F^S}{\Phi^S c^S n_d^S F^S} \quad (3)$$

where  $c$  is the concentration of the solution,  $n_d$  is the refractive index of the solution,  $F$  is the TPEF integral intensities of the solution emitted at the exciting wavelength, and  $\Phi$  is the fluorescence quantum yield. Superscript *Ref* and *S* stand for reference and sample respectively.

## Stability measurements

**Photostability** was monitored by recording the fluorescence intensity  $I$  over time (60min) under continuous excitation. **Figure S-3** shows the fluorescence intensity over time measured for **1** in dilute chloroform solution, for **1@F127-SiO<sub>2</sub>** NPs in water and DPBS (1x) and for *Fluorescein* in water (0.1M NaOH). Fluorescence intensity is expressed as  $I/I_0$ , where  $I_0$  is the fluorescence intensity at maximum emission for time 0.

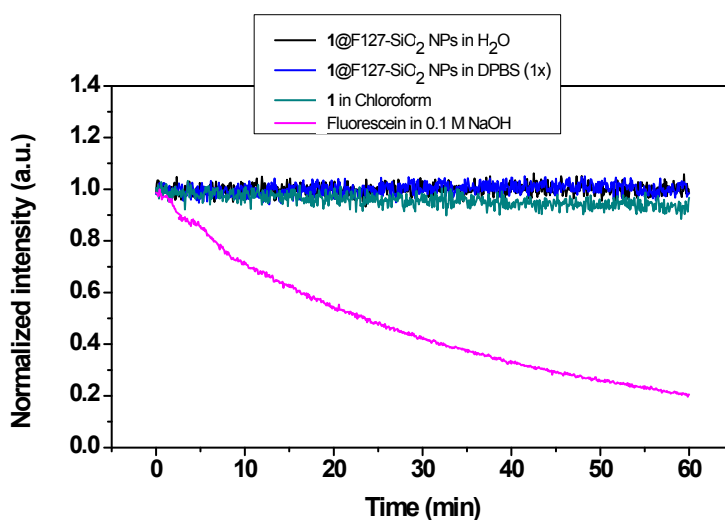

**Fig. S3.** Photostability of **1** and **1@F127-SiO<sub>2</sub>** NPs compared with *Fluorescein*. Samples were excited at 500nm and monitored at their maximum emission peaks.

**Colloidal stability** was checked recording the evolution of the DLS size distribution (**Figure S-4**) and the fluorescence intensity and profile (**Figure S-5**) of **1@F127-SiO<sub>2</sub>** NPs in 1 $\times$  DPBS over a two-weeks period of time.

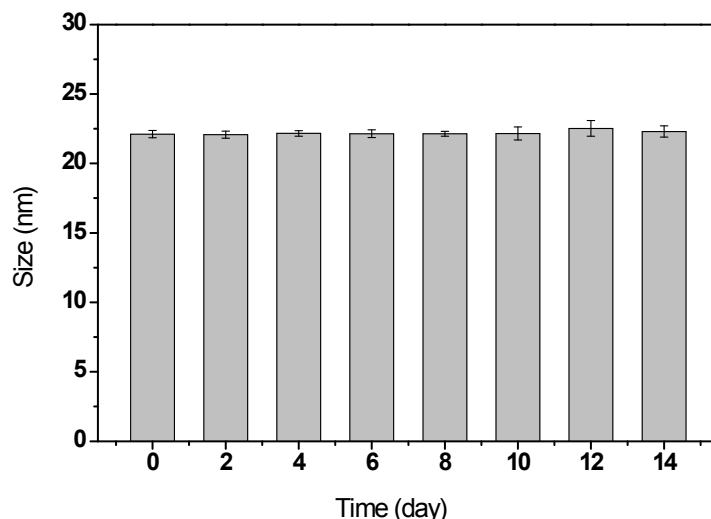

*Fig. S4.* Evolution of the DLS size distribution evolution for 1@F127-SiO<sub>2</sub> NPs in 1× DPBS over two weeks.

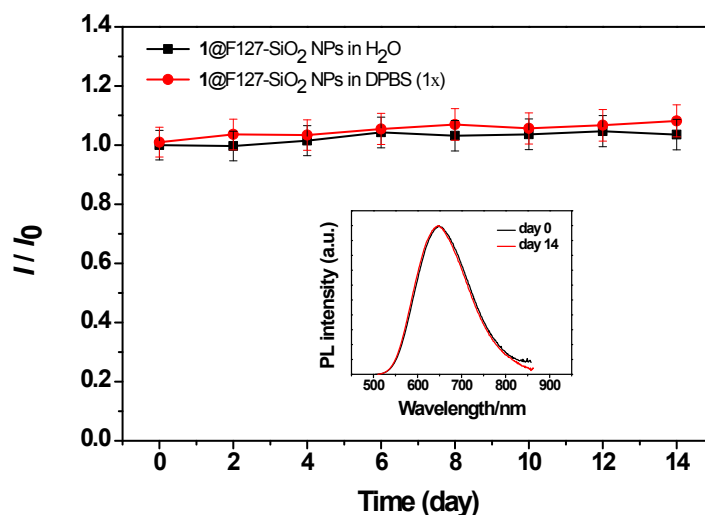

*Fig. S5.* Evolution of the fluorescence intensity ( $I/I_0$ ) of 1@F127-SiO<sub>2</sub> NPs in 1× DPBS over two weeks.

## Cytotoxicity Cells Assays

**Cell culture protocol:** HepG2 cells were cultured in Dulbecco's modified Eagle's medium (DMEM) (Invitrogen Corp.) supplemented with 10 % (v/v) fetal bovine serum (Invitrogen Corp.), 50 U.mL<sup>-1</sup> penicillin, and 50 µg.mL<sup>-1</sup> streptomycin (Invitrogen Corp.) in a humidified incubator containing 5 % CO<sub>2</sub> in air at 37°C.

**Viability tests:** 10.10<sup>3</sup> HepG2 cells were seeded in 100µL of supplemented DMEM in a clear 96 well plate (Corning Costar). After 24h incubation, the medium was removed. Cells were washed with PBS and medium was replaced by an appropriate volume of DMEM (Invitrogen Corp.). The NPs solution from the synthesis, after dialysis and filtration, was diluted (final volume of 150µL) to create a range of concentration (dilution 1:100 to 1:10000). Cells were then incubated for 24h. The supernatant was subsequently removed and cells were washed with PBS. 100µL of DMEM and 20µL of the MTS reagent (CellTiter 96R AQueous NonRadioactive Cell Proliferation Assay, Promega) were added. Cells were incubated for another 4h period and the absorbance at 490nm was measured with a microplate

reader (Multiscan GO Microplate Spectrophotometer, Thermo Scientific). The percentage of viable cells was calculated by dividing the absorbance at a given dilution by the absorbance of the blank. The results given (*Fig. S-6*) are the average of 2 independent experiments performed in triplicate.

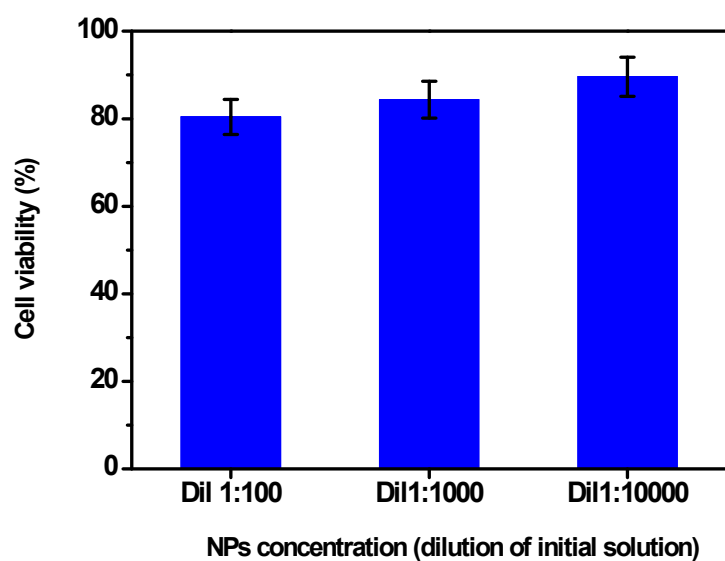

*Fig. S6.* MTT assay of HepG2 cells treated with 1@F127-SiO<sub>2</sub> NPs suspensions at different dilutions for 24 h.



# *In vivo* two-photon microscopy

**Image processing** was performed with NIH ImageJ software.[8] Vasculature and tumour segmentation were performed using supervised classification with Ilastik software.[9] A 3D model of segmented objects was generated using ImageJ 3D viewer.[10] Texture projection and 3D rendering were performed with Blender (GNU General Public License, Blender Foundation). See legends of figures for details.

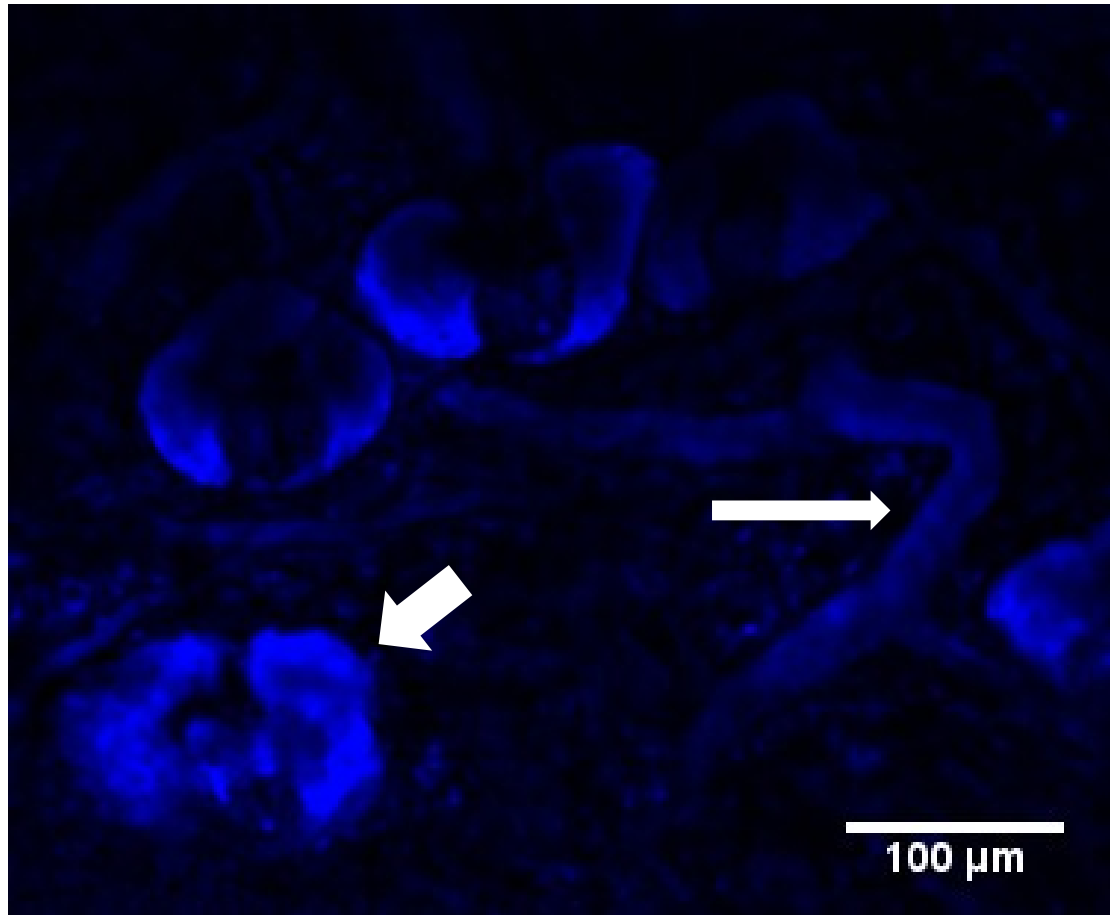

**Fig. S7.** Two-photon microscopy image of the maximum intensity projection after 1 min circulation of blue NPs in a mouse ear. The longest arrow indicate the heterogeneous circulation of the NP in a capillary: areas with the slowest perfusion are associated to higher maximum intensity projections. The smallest arrow shows endogenous fluorescence signals from sebaceous glands. These glands are at the surface of the skin, indicating that the imaging depth is less than 100  $\mu\text{m}$ . Two-photon excitation was at 750 nm, scale bare = 100 $\mu\text{m}$ .

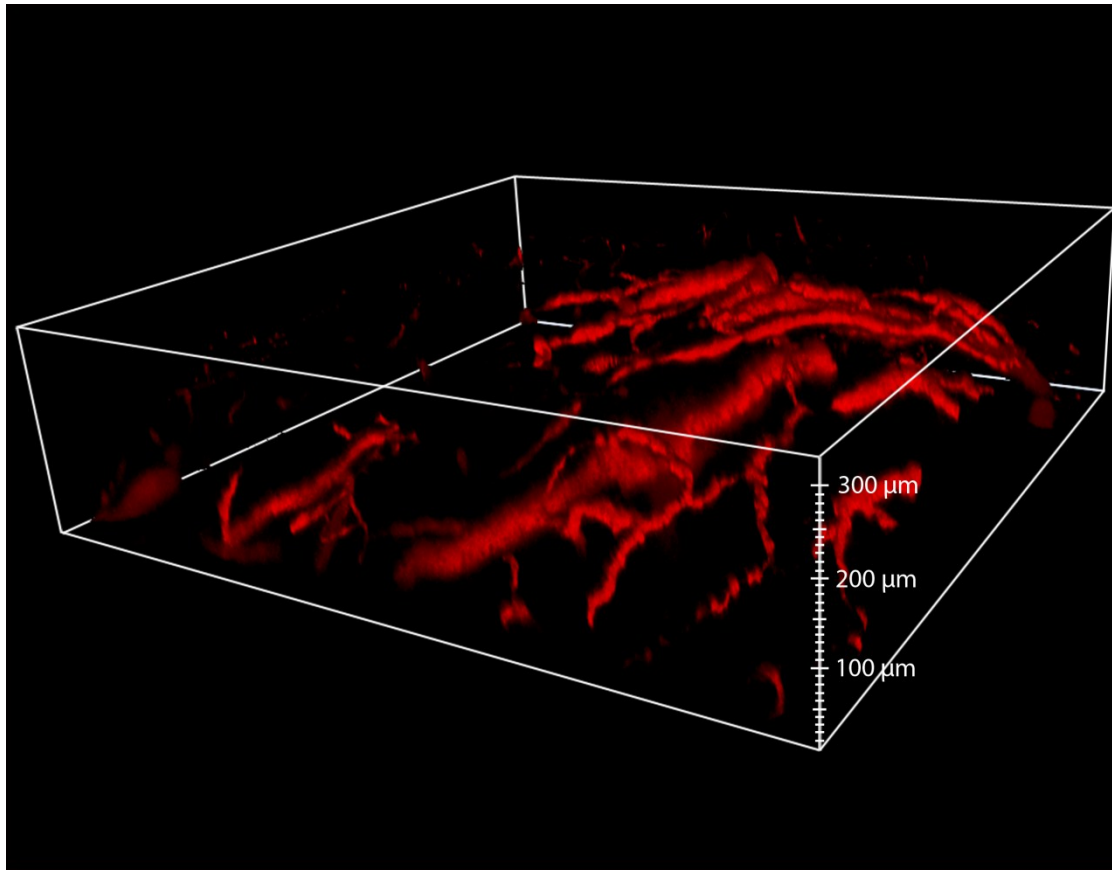

**Fig. S8.** 3D two-photon microscopy image of the functional vasculature (red signal of circulating  $\mathbf{1@F127-SiO_2}$  NPs) at the surface of a human glioma growing subcutaneously in a mouse ear. The image is a 3D reconstruction using free software (Blender) after a 3D mosaic acquisition (x-y plane:  $6 \times 6$  images of  $512^2$  pixels with 91 slices in the z-direction, step-size  $2 \mu\text{m}$ , imaging depth  $360 \mu\text{m}$ , total acquisition time 5600 s).

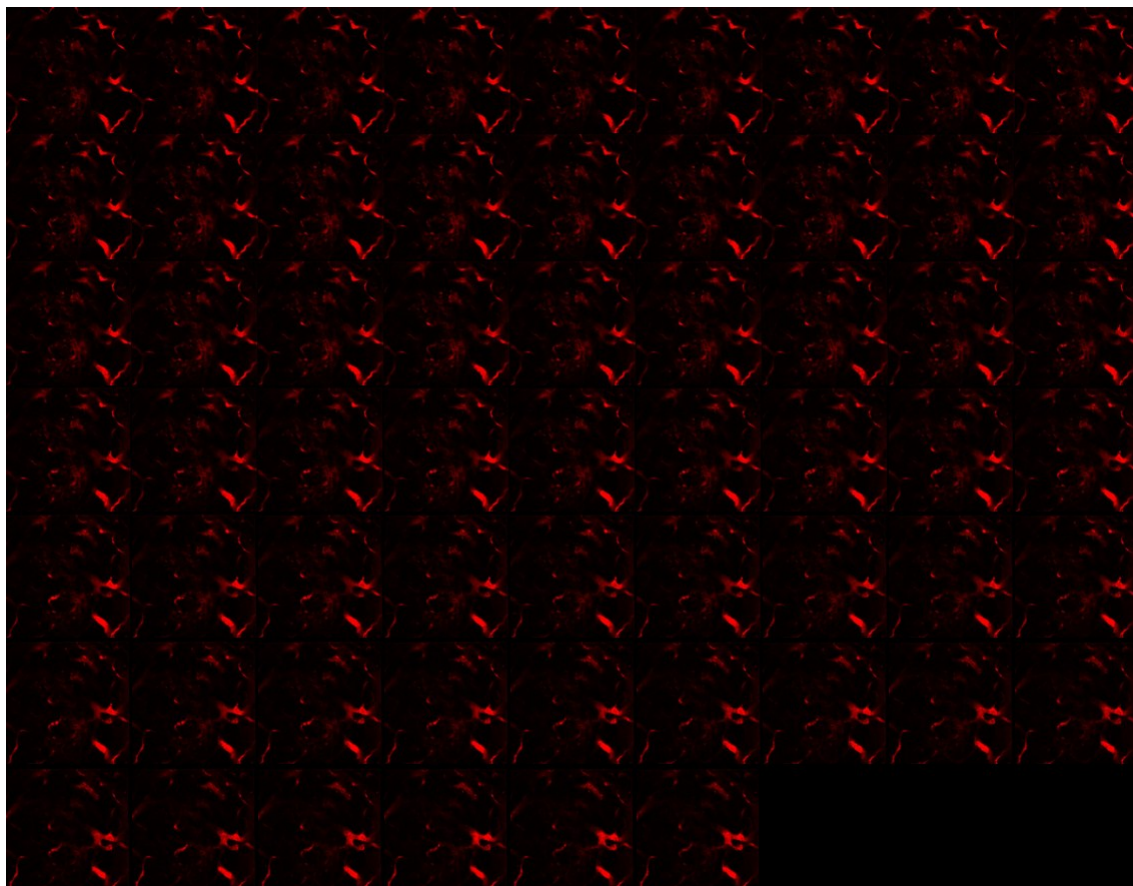

**Fig. S9.** 1@F127-SiO<sub>2</sub> NPs: time lapse acquisition over 1 hour (1 image per minute) showing the vasculature and the lack of diffusion in the tumour (2hv excitation 1000nm).

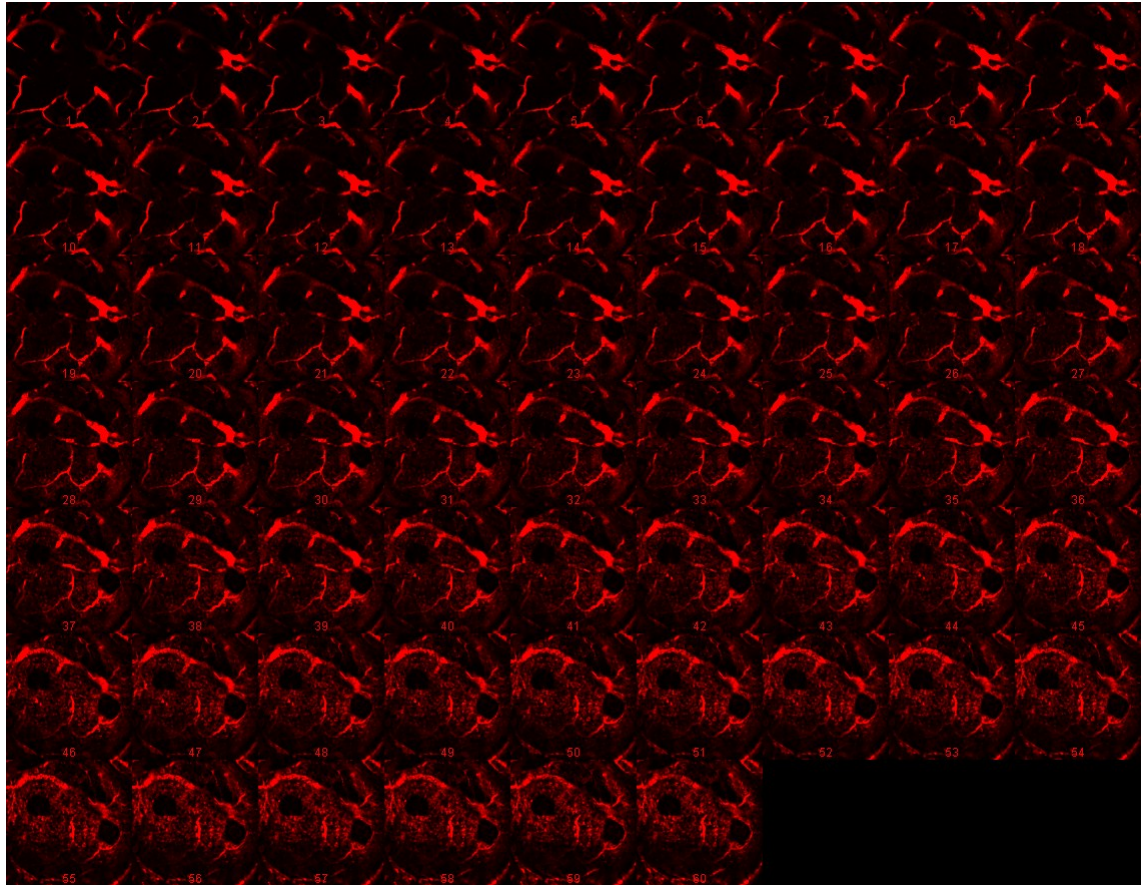

**Fig. S10.** RhB-dextran 70 kDa: time lapse acquisition over 1 hour (1 image per minute) showing the vasculature and the diffusion of RhB-dextran 70 kDa in tumour (2hv excitation 800nm).

# References

---

- [1] a) A. Baheti, P. Tyagi, K. R. J. Thomas, Y.-C. Hsu, J. T. s. Lin, *J. Phys. Chem. C* **2009**, *113*, 8541-8547;  
b) A. R. Morales, A. Frazer, A. W. Woodward, H.-Y. Ahn-White, A. Fonari, P. Tongwa, T. Timofeeva, K. D. Belfield, *J. Org. Chem.* **2013**, *78*, 1014–1025.
- [2] W. Qin, D. Ding, J. Liu, W. Z. Yuan, Y. Hu, B. Liu, B. Z. Tang, *Adv. Funct. Mater.* **2012**, *22*, 771-779.
- [3] N. Boens, W. Qin, N. Basarić, J. Hofkens, M. Ameloot, J. Pouget, J.-P. Lefèvre, B. Valeur, E. Gratton, M. vandeVen, N. D. J. Silva, Y. Engelborghs, K. Willaert, A. Sillen, A. J. W. G. Visser, A. van Hoek, J. R. Lakowicz, H. Malak, I. Gryczynski, A. G. Szabo, D. T. Krajcarski, N. Tamai, A. Miura, *Anal. Chem.* **2007**, *79*, 2137-2149.
- [4] J. C. de Mello, H. F. Wittmann, R. H. Friend, *Adv. Mater.* **1997**, *9*, 230-232.
- [5] L. Porrès, A. Holland, L.-O. Pålsson, A. P. Monkman, C. Kemp, A. Beeby, *J. Fluoresc.* **2006**, *16*, 267-272.
- [6] J. R. Lakowicz, in *Principle of Fluorescence Spectroscopy*, 3<sup>rd</sup> ed. (Ed.: K. Academic/Plenum), New York, **2006**, pp. 873-882.
- [7] a) C. Xu, W. W. Webb, *J. Opt. Soc. Am. B* **1996**, *13*, 481-491;  
b) N. S. Makarov, M. Drobizhev, A. Rebane, *Opt. Express* **2008**, *16*, 4029-4047.
- [8] J. Schindelin, C. T. Rueden, M. C. Hiner, and K. W. Eliceiri, "The ImageJ ecosystem: An open platform for biomedical image analysis" *Mol. Reprod. Dev.* **2015**, *82*, 518-529.
- [9] C. Sommer, C. Strahle, U. Köthe, and F. A. Hamprecht, "Ilastik: Interactive learning and segmentation toolkit", *Biomedical Imaging: From Nano to Macro, 2011 IEEE International Symposium on*, Chicago, IL, 2011, pp. 230-233. DOI: 10.1109/ISBI.2011.587239.
- [10] B. Schmid, J. Schindelin, A. Cardona, M. Longair, and M. Heisenberg, "A high-level 3D visualization API for Java and ImageJ", *BMC Bioinformatics* **2010**, *11*, 274. DOI: 10.1186/1471-2105-11-274.

# Additional Data

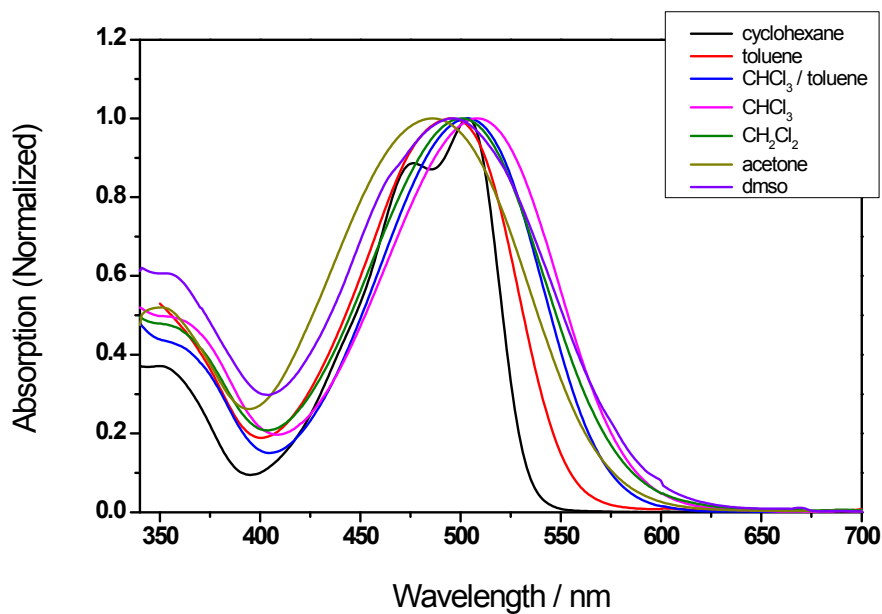

Fig. S11. Absorption spectra of **1** in various solvents.

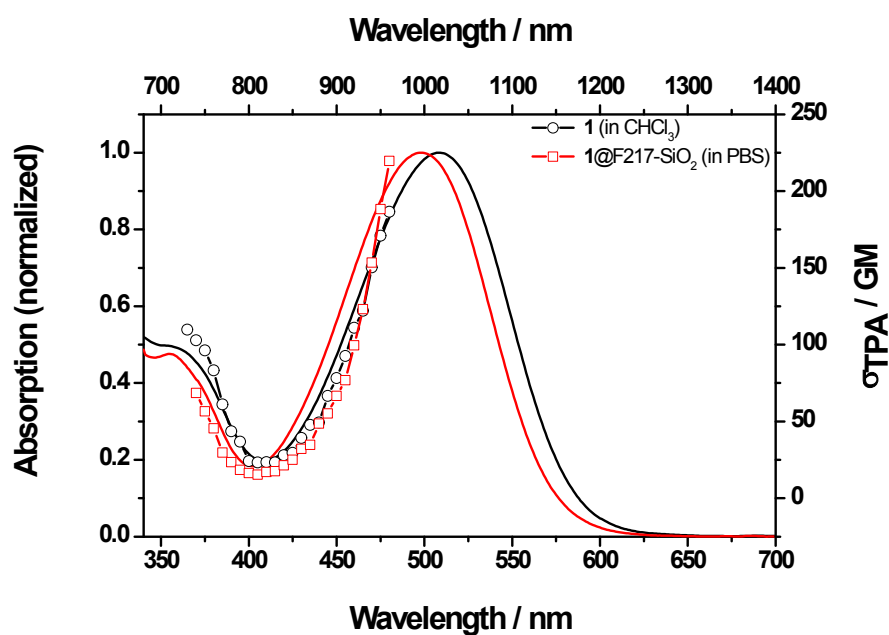

Fig. S12. Absorption spectrum and two-photon absorption cross-sections of **1** in CHCl<sub>3</sub> solution in the 740–960 nm range (1@F127-SiO<sub>2</sub> NPs in PBS is given for comparison).



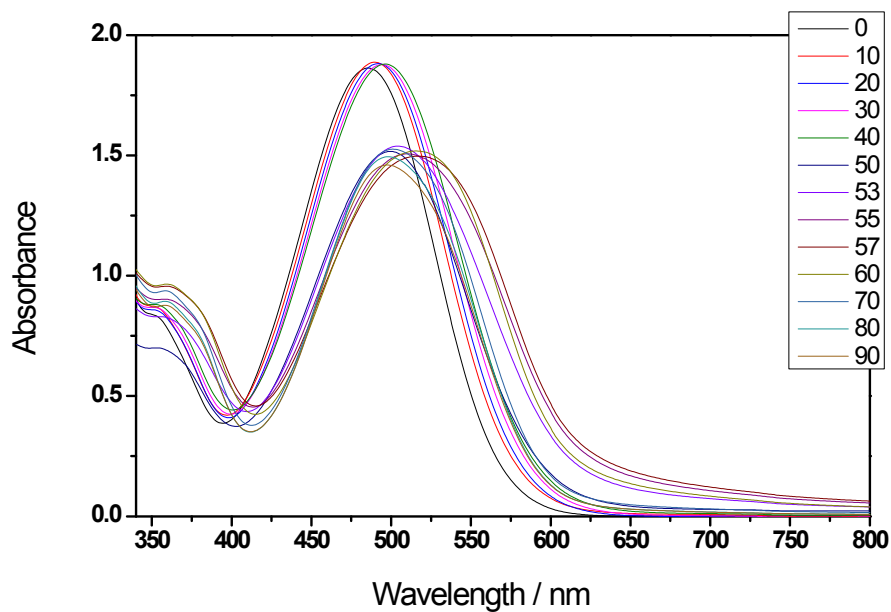

*Fig. S13.* Variation of the absorption spectra of **1** in acetone/water mixture with increasing water fraction (wt %).

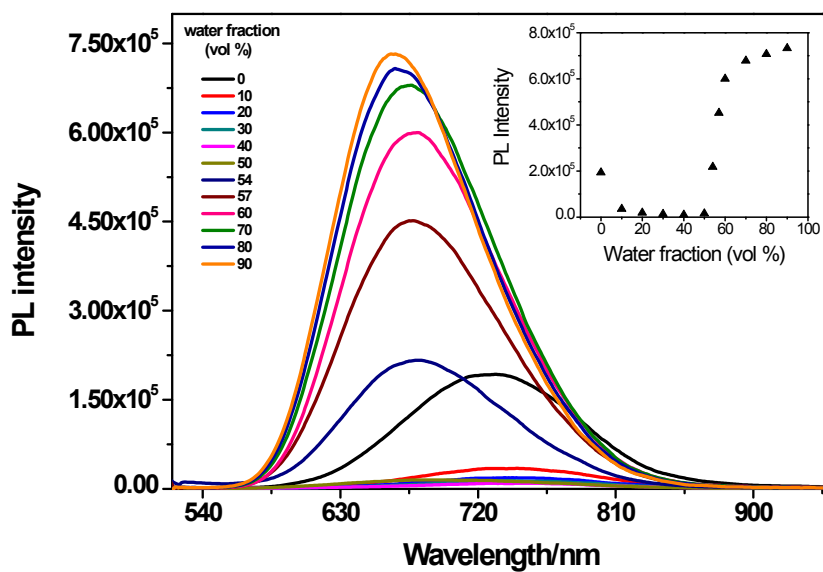

*Fig. S14.* Variation of the emission spectra of **1** in acetone/water mixture with increasing water fraction (wt %). Inset: increase of the emission intensity with increasing water fraction showing the AIE behaviour of **1**.

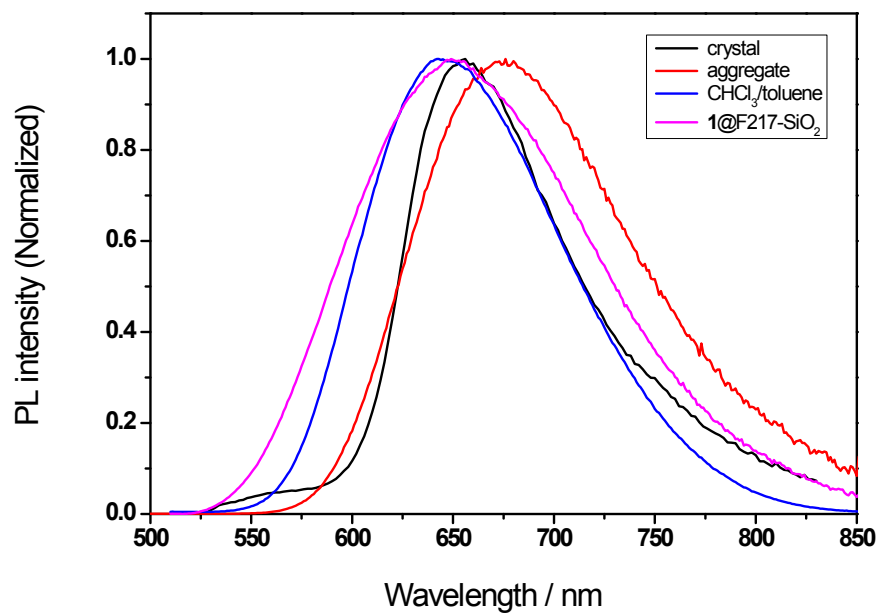

**Fig. S15.** Emission spectra of **1** in crystal, in aggregate in acetone/water mixture (80% wt water), in 1/1 (v/v) toluene/CHCl<sub>3</sub> solution and of **1@F127-SiO<sub>2</sub>** NPs in PBS.



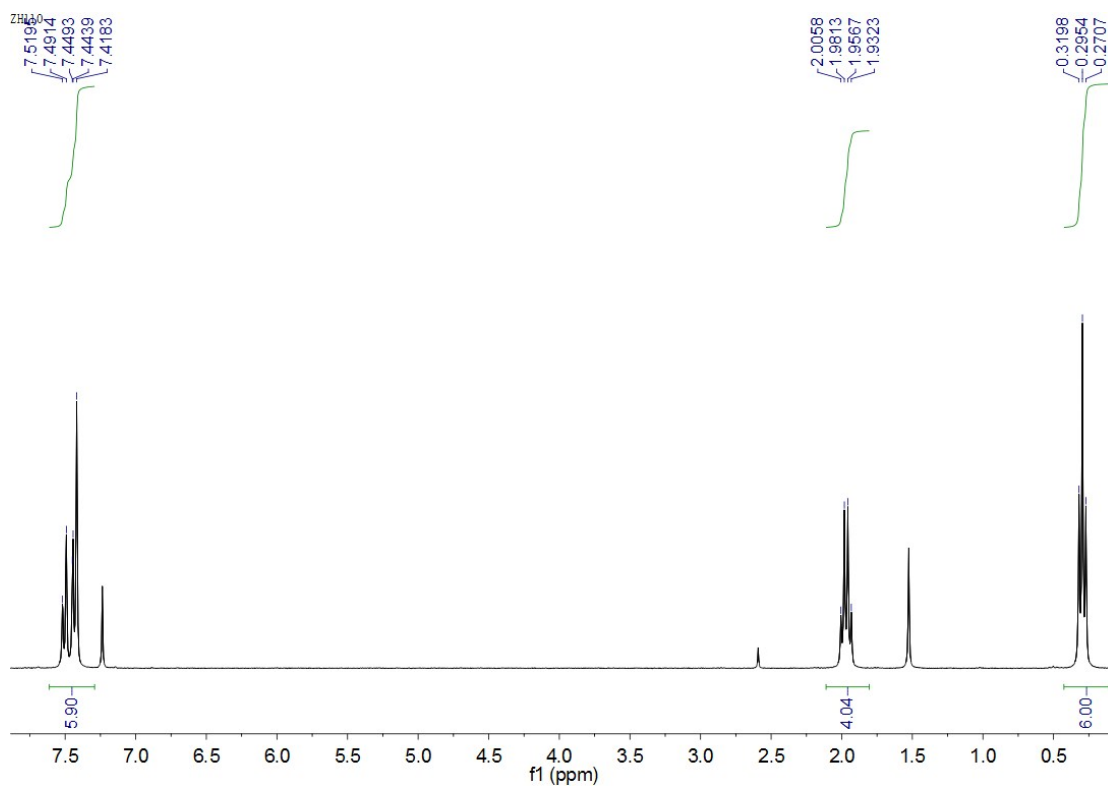

**Fig. S16.**  $^1\text{H}$  NMR spectrum of 2,7-dibromo-9,9-diethylfluorene in  $\text{CDCl}_3$ .

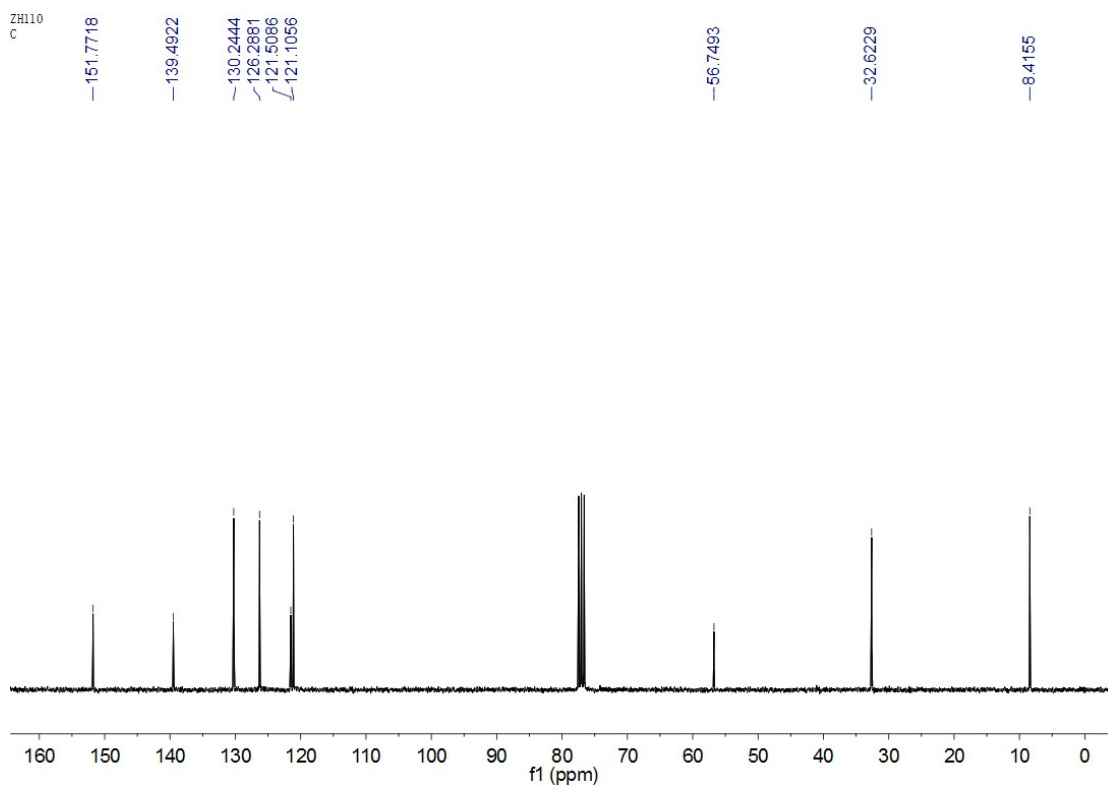

**Fig. S17.**  $^{13}\text{C}$  NMR spectrum of 2,7-dibromo-9,9-diethylfluorene in  $\text{CDCl}_3$ .

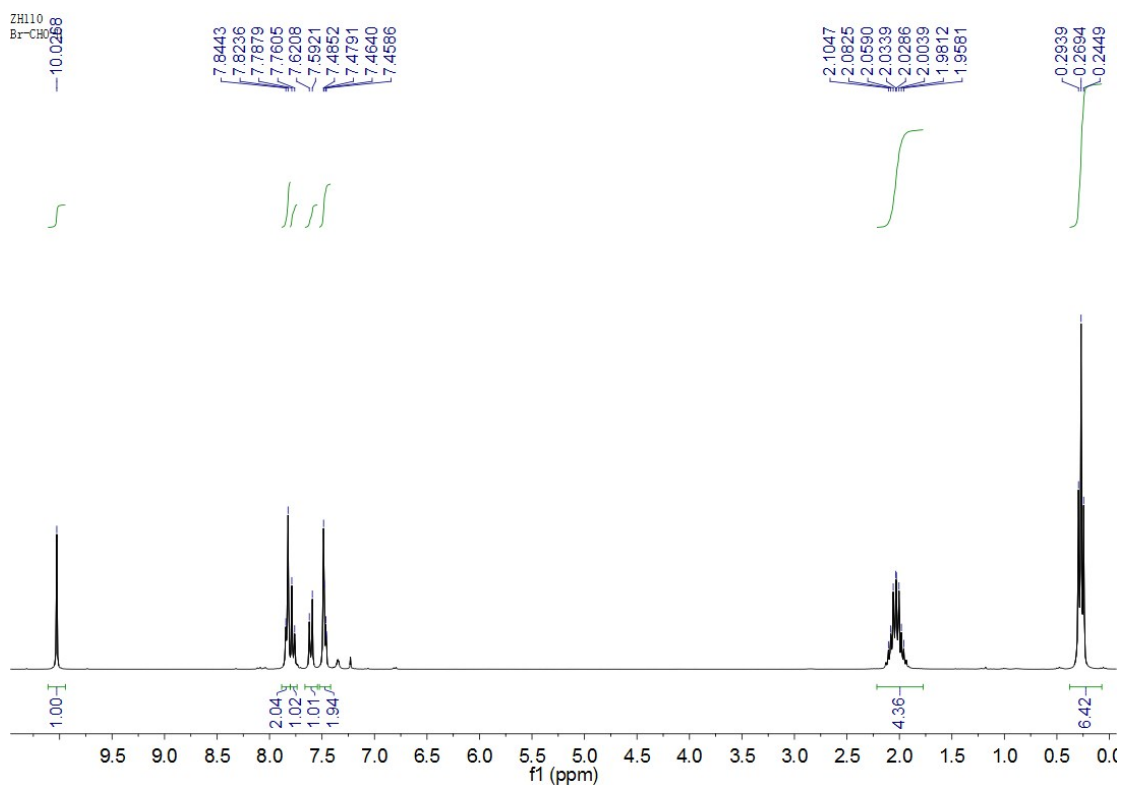

**Fig. S18.** <sup>1</sup>H NMR spectrum of 7-bromo-9,9-diethylfluorene-2-carbaldehyde in CDCl<sub>3</sub>.

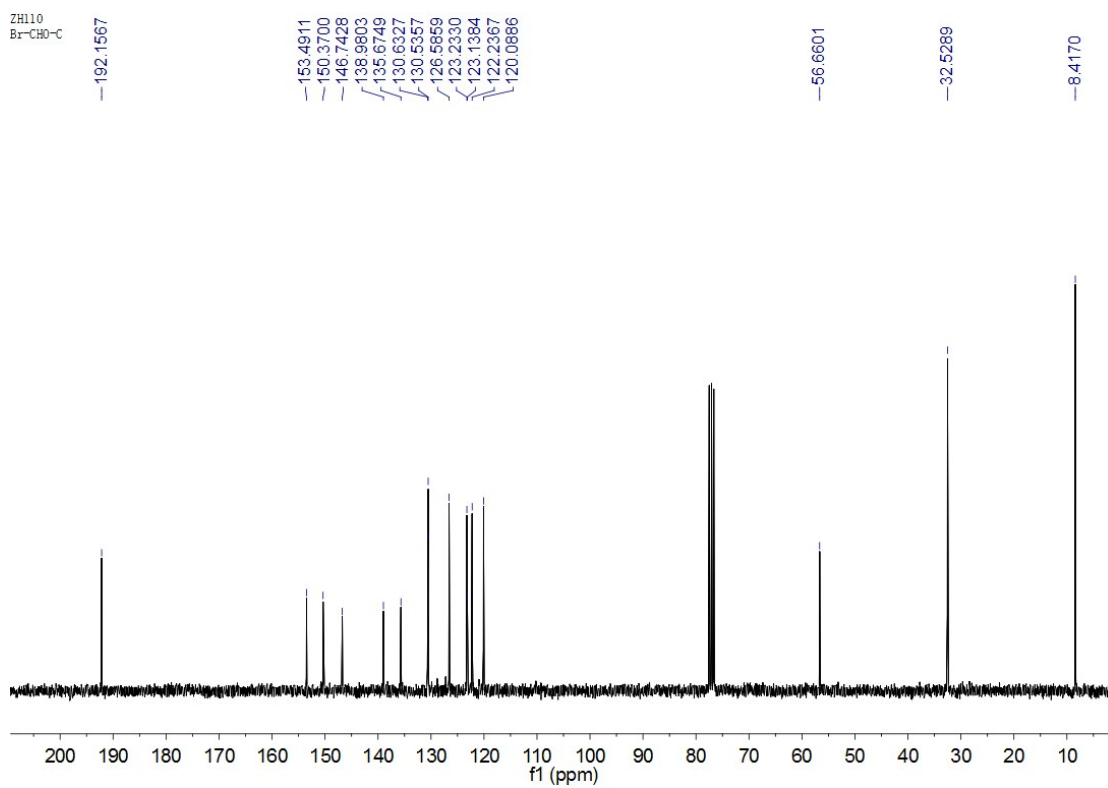

**Fig. S19.** <sup>13</sup>C NMR spectrum of 7-bromo-9,9-diethylfluorene-2-carbaldehyde in CDCl<sub>3</sub>.

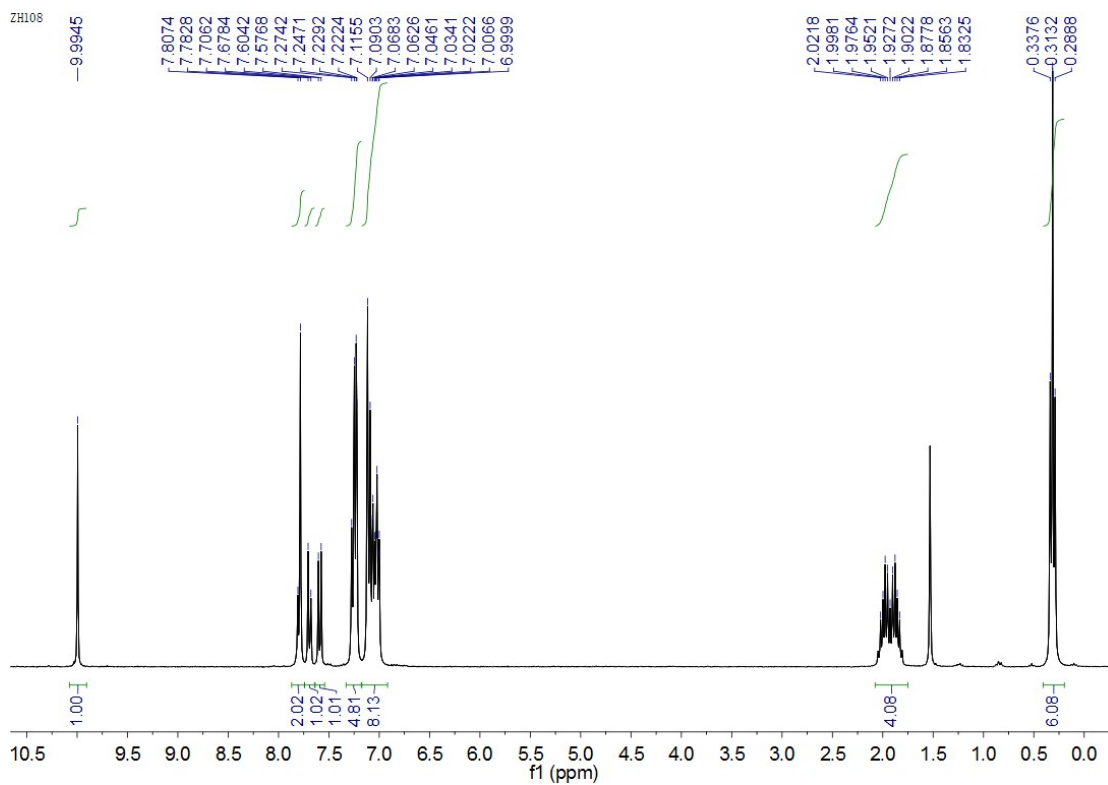

**Fig. S20.**  $^1\text{H}$  NMR spectrum of 7-(diphenylamino)-9,9-diethylfluorene-2-carbaldehyde **2** in  $\text{CDCl}_3$ .

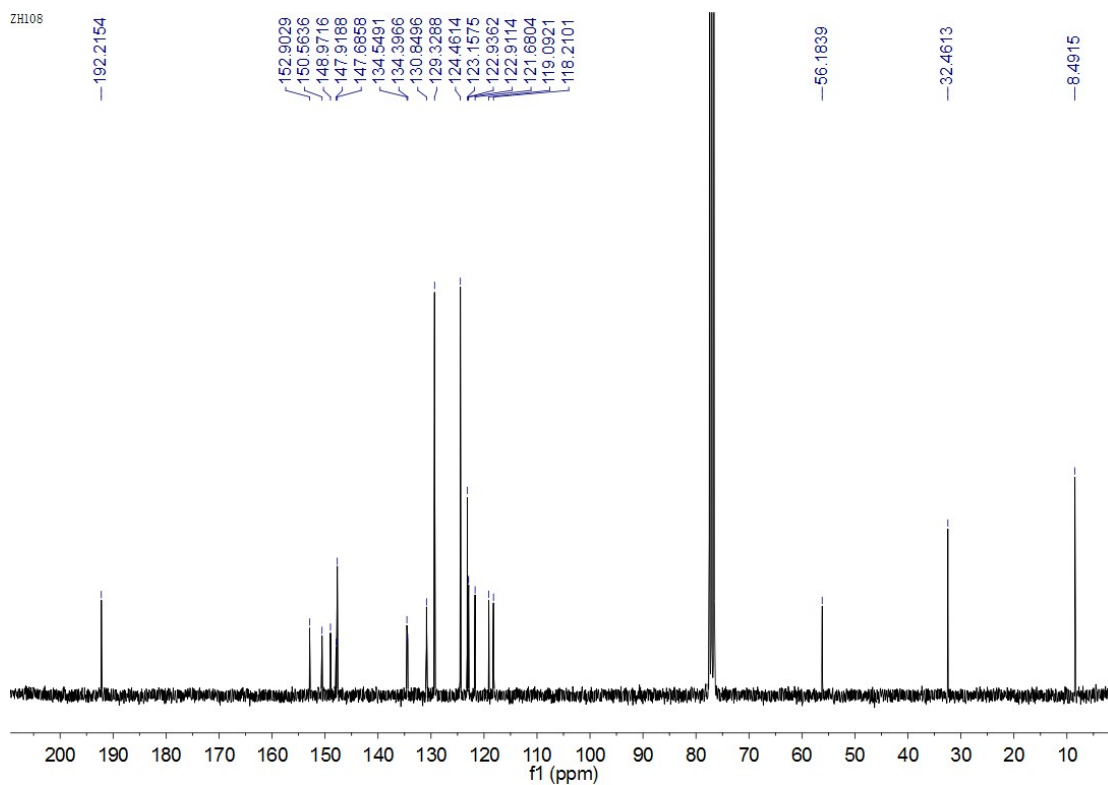

**Fig. S21.**  $^{13}\text{C}$  NMR spectrum of 7-(diphenylamino)-9,9-diethylfluorene-2-carbaldehyde **2** in  $\text{CDCl}_3$ .

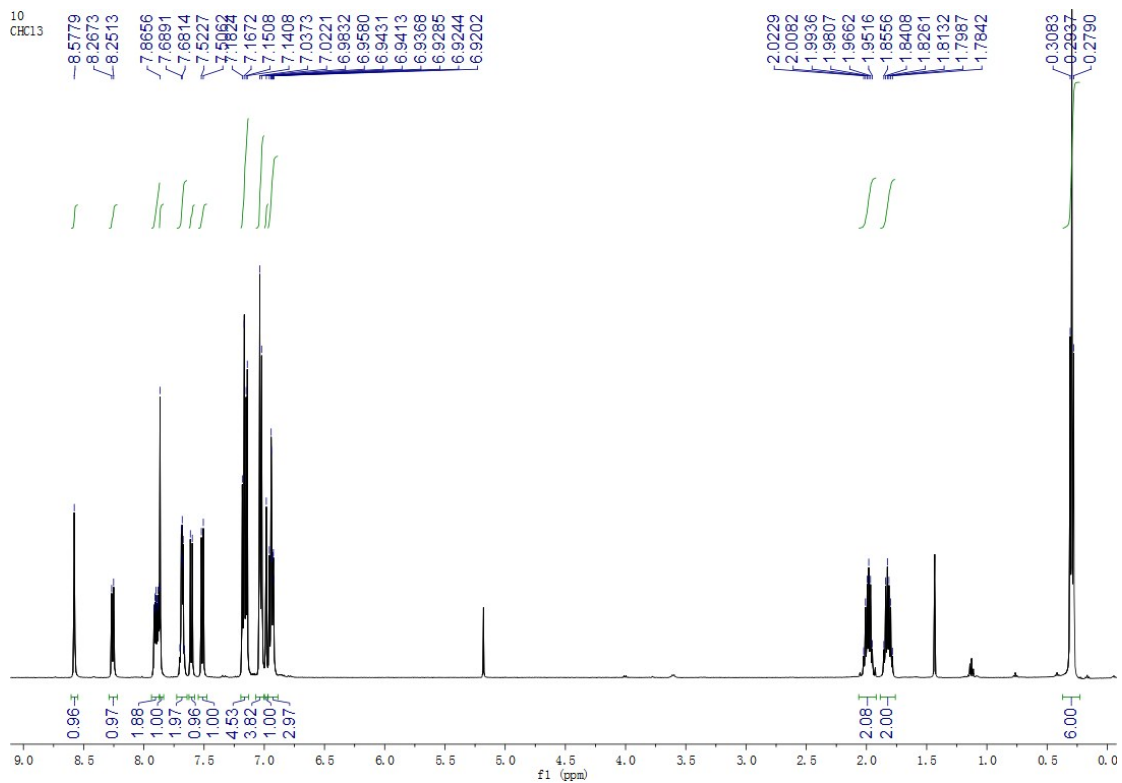

Fig. S22. <sup>1</sup>H NMR spectrum of **1** in CDCl<sub>3</sub>.

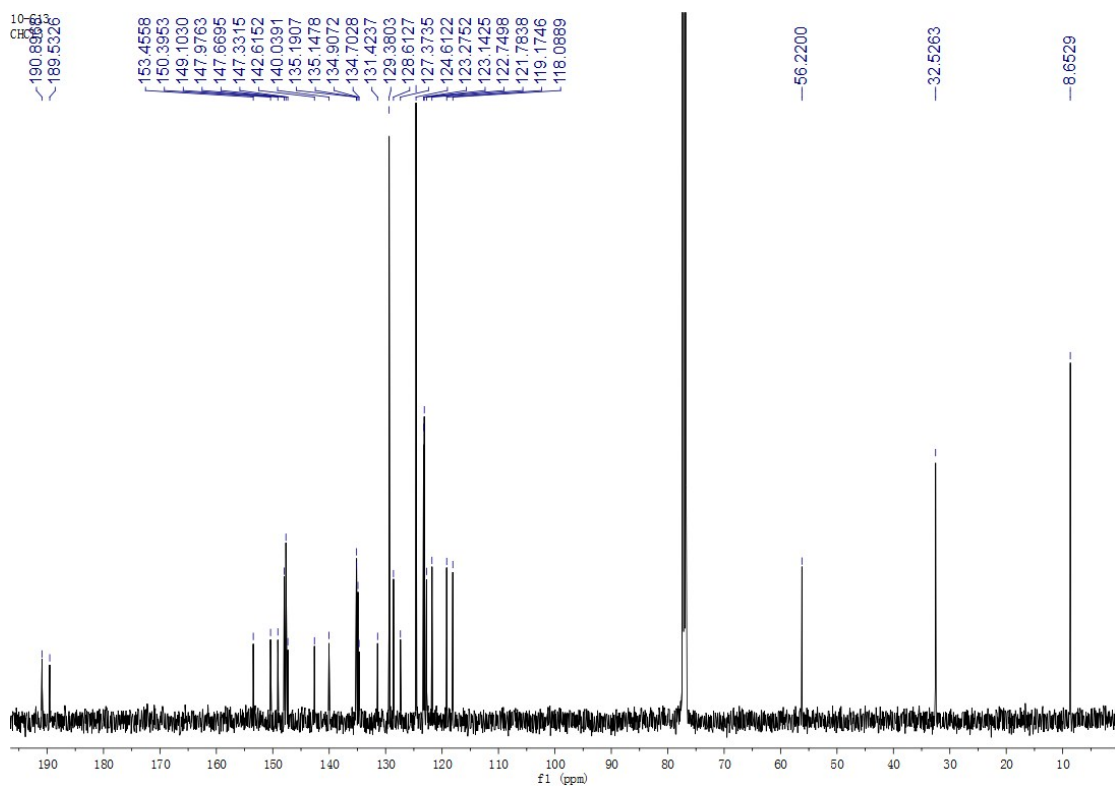

Fig. S23. <sup>13</sup>C NMR spectrum of **1** in CDCl<sub>3</sub>.

CENTRE COMMUN DE SPECTROMETRIE DE MASSE

Analysis Info

Analysis Name QTOF\_150330\_23\_10.d  
 Method MS\_inf\_TL\_50\_1000\_2014\_woCollSweep\_Pos\_CCSM.m Acquisition Date 3/30/2015 2:43:39 PM  
 Comment Instrument / Ser# micrOTOF-Q II 10231

Acquisition Parameter

|             |            |                       |           |                  |           |
|-------------|------------|-----------------------|-----------|------------------|-----------|
| Source Type | ESI        | Ion Polarity          | Positive  | Set Nebulizer    | 0.4 Bar   |
| Focus       | Not active | Set Capillary         | 1500 V    | Set Dry Heater   | 200 °C    |
| Scan Begin  | 50 m/z     | Set End Plate Offset  | -500 V    | Set Dry Gas      | 4.0 l/min |
| Scan End    | 1000 m/z   | Set Collision Cell RF | 600.0 Vpp | Set Divert Valve | Waste     |

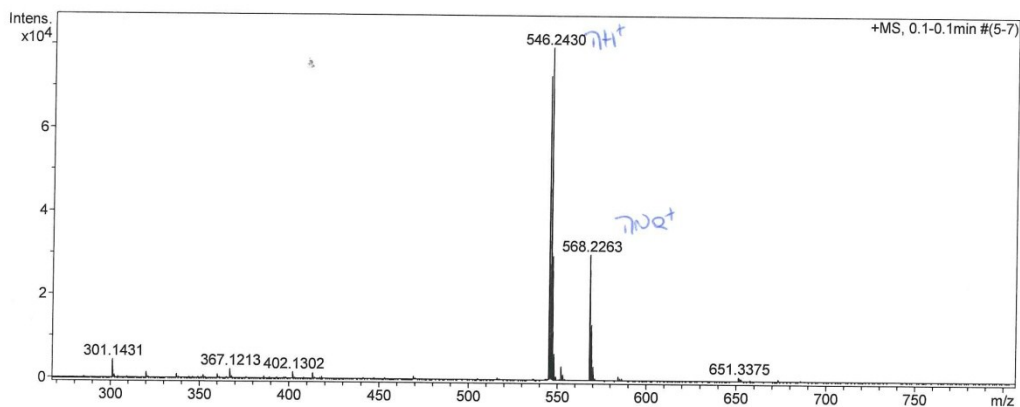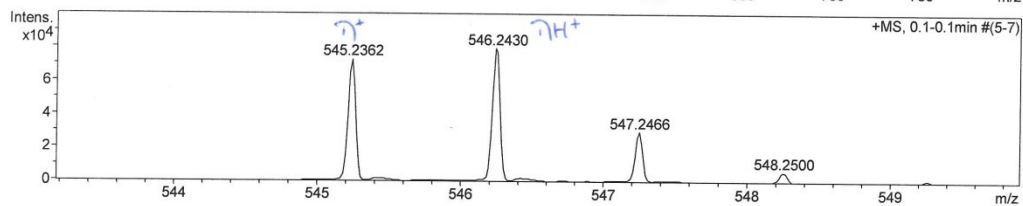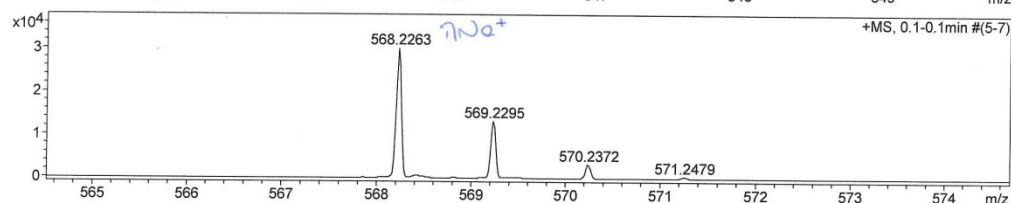

| Meas. m/z | Formula            | m/z      | err [ppm] | mSigma |
|-----------|--------------------|----------|-----------|--------|
| 546.2430  | C 39 H 32 N O 2    | 546.2428 | -0.4      | 28.5   |
| 568.2263  | C 39 H 31 N Na O 2 | 568.2247 | -2.9      | 10.2   |

Fig. S24. HRMS spectrum of 1.
